# Supplementary material
Source: PubMed Central journal article supplement (PMC4256842)

## Supplemental Text S1. Model Sensitivity Analysis

The effects of varying model parameters on the model goodness of fit (sum of squared errors, SSE) and estimated carboxysome mass transfer coefficient ( $f_{c-x}$ ) was assessed. Parameter variability was set based on standard deviations or standard errors in parameters or, if these were unavailable, were set to 50% of the base model value (Supplemental Table S1). First the model was rerun varying each of the parameters singly. The model only showed substantial sensitivity (defined as  $>\pm 5\%$  change in SSE) to variation in  $pH_c$ ,  $k_{cat-R}$ ,  $K_{m-B}$ , and  $V_{max-B}$ , and the optimized parameter  $f_{c-x}$  stayed within a fairly narrow range ( $1.5 - 5.0 \times 10^{-15} \text{ cm}^3 \text{ s}^{-1}$ ). Since  $K_{m-B}$  and  $V_{max-B}$  are derived from the same data the model attempts to fit, the sensitivity of the model to these parameters was expected and is not very relevant to understanding model performance. As can be seen in Table S2 varying these parameters in either direction from the base model value decreases model performance. Decreasing  $pH_c$ , the internal pH, improves the model fit because higher  $\text{CO}_2$  values are achieved in the carboxysome at low internal  $C_i$  concentrations. However, to keep  $\text{CO}_2$  effluxes consistent with the data, the carboxysome  $\text{CO}_2$  mass transfer coefficient ( $f_{c-x}$ ) must be reduced to compensate for the increased  $\text{CO}_2$  concentrations. Similarly increasing  $pH_c$ , worsens the model fit since lower carboxysome  $\text{CO}_2$  concentrations are achieved and  $f_{c-x}$  increases so that  $\text{CO}_2$  effluxes remain constant. Decreasing  $k_{cat-R}$ , the RubisCO maximal turnover rate, decreases model performance because it reduces RubisCO capacity ( $k_{cat-R} * m_R$ ), which as described in the main text is critical to model performance. On the other hand increasing  $k_{cat-R}$  and so RubisCO capacity improves the model, showing that the model would actually fit the data better with even more excess RubisCO capacity. We tested for potential interactions between variability in  $pH_c$  and  $k_{cat-R}$  and found that the model behaved in a predictable manner. Increasing pH and decreasing  $k_{cat-R}$  decreased model performance to a much greater extent than changing either alone (Table S3), whereas decreasing pH and increasing  $k_{cat-R}$  significantly improved the model fit. The other combinations of these parameters essentially canceled each other out.

Supplemental Table S1. Model Parameters and Variability. When available parameter error estimates (standard deviations, SD, or standard errors, SE) were used to establish variability in parameters for the model sensitivity analysis, but when not available variability was typically set to 50% of the base value. Units for each parameter are given in Table 3.

| parameter          | base value             | error estimate          | estimated variability | notes                                                                                                       |
|--------------------|------------------------|-------------------------|-----------------------|-------------------------------------------------------------------------------------------------------------|
| pH <sub>c</sub>    | 7.35                   | 0.13                    | --                    | SD between values reported by Falkner et al. (1976), Kallas and Dahlquist (1981), and Belkin et al. (1987). |
| k <sub>cf</sub>    | 3 x10 <sup>-2</sup>    | --                      | 1.5 x10 <sup>-2</sup> | 50% of base parameter value                                                                                 |
| k <sub>xf</sub>    | 1000                   | --                      | 500                   | 50% of base parameter value                                                                                 |
| m <sub>R</sub>     | 6.6 x10 <sup>-21</sup> | 0.56 x10 <sup>-21</sup> | --                    | from SD of measurements                                                                                     |
| K <sub>m-R</sub>   | 263                    | 21                      | --                    | SD between our value and Roberts et al. (2012) value                                                        |
| k <sub>cat-R</sub> | 10.6                   | 3.3                     | --                    | SD among bacterial RubisCOs in Tcherkez et al. (2006)                                                       |
| K <sub>m-B</sub>   | 82                     | 15                      | --                    | SE of model fit to Bup data; Table 1                                                                        |
| V <sub>max-B</sub> | 2.5 x10 <sup>-20</sup> | 0.12 x10 <sup>-20</sup> | --                    | SE of model fit to Bup data; Table 1                                                                        |
| N <sub>x</sub>     | 6                      | --                      | 3                     | 50% of base parameter value                                                                                 |
| f <sub>c-c</sub>   | 1 x10 <sup>-8</sup>    | --                      | 0.5 x10 <sup>-8</sup> | 50% of base parameter value                                                                                 |
| f <sub>b-x</sub>   | 6 x10 <sup>-10</sup>   | --                      | 3 x10 <sup>-10</sup>  | 50% of base parameter value                                                                                 |

Supplemental Table S2. Effect of varying model parameters on the optimized carboxysome mass transfer coefficient (f<sub>c-x</sub>) and the model fit (% change in sum of squared error (SSE) from base model SSE). A positive change in SSE indicates a worse fit of the model to the data, while a negative change in SSE indicates and improved fit.

| parameter          | base value              | low value               | f <sub>c-x</sub> fit   | %SSE         | high value              | f <sub>c-x</sub> fit   | %SSE         |
|--------------------|-------------------------|-------------------------|------------------------|--------------|-------------------------|------------------------|--------------|
| pH <sub>c</sub>    | 7.35                    | 7.22                    | 1.5 x10 <sup>-15</sup> | <b>-5.9%</b> | 7.48                    | 3.7 x10 <sup>-15</sup> | <b>10.1%</b> |
| k <sub>cf</sub>    | 3.0 x10 <sup>-2</sup>   | 1.50 x10 <sup>-2</sup>  | 2.9 x10 <sup>-15</sup> | -0.3%        | 4.5 x10 <sup>-2</sup>   | 2.0 x10 <sup>-15</sup> | 0.3%         |
| k <sub>xf</sub>    | 1000                    | 500                     | 2.5 x10 <sup>-15</sup> | 0.8%         | 1500                    | 2.4 x10 <sup>-15</sup> | -0.3%        |
| m <sub>R</sub>     | 6.60 x10 <sup>-21</sup> | 6.04 x10 <sup>-21</sup> | 2.4 x10 <sup>-15</sup> | 2.8%         | 7.16 x10 <sup>-21</sup> | 2.4 x10 <sup>-15</sup> | -2.2%        |
| K <sub>m-R</sub>   | 263                     | 242                     | 2.4 x10 <sup>-15</sup> | -2.0%        | 284                     | 2.4 x10 <sup>-15</sup> | 2.0%         |
| k <sub>cat-R</sub> | 10.6                    | 7.3                     | 2.4 x10 <sup>-15</sup> | <b>16.2%</b> | 13.9                    | 2.5 x10 <sup>-15</sup> | <b>-6.2%</b> |
| K <sub>m-B</sub>   | 82                      | 67                      | 2.7 x10 <sup>-15</sup> | <b>25.2%</b> | 97                      | 2.3 x10 <sup>-15</sup> | <b>10.6%</b> |
| V <sub>max-B</sub> | 2.54 x10 <sup>-20</sup> | 2.42 x10 <sup>-20</sup> | 2.0 x10 <sup>-15</sup> | <b>16.0%</b> | 2.66 x10 <sup>-20</sup> | 2.9 x10 <sup>-15</sup> | <b>16.0%</b> |
| N <sub>x</sub>     | 6                       | 3                       | 5.0 x10 <sup>-15</sup> | 0.8%         | 9                       | 1.6 x10 <sup>-15</sup> | -0.3%        |
| f <sub>c-c</sub>   | 1.0 x10 <sup>-08</sup>  | 0.5 x10 <sup>-08</sup>  | 2.4 x10 <sup>-15</sup> | 0.0%         | 1.5 x10 <sup>-08</sup>  | 2.4 x10 <sup>-15</sup> | 0.0%         |
| f <sub>b-x</sub>   | 6.0 x10 <sup>-10</sup>  | 3.0 x10 <sup>-10</sup>  | 2.4 x10 <sup>-15</sup> | 0.0%         | 9.0 x10 <sup>-10</sup>  | 2.4 x10 <sup>-15</sup> | 0.0%         |

Supplemental Table S3. Interactions between model parameters.

| $pH_c$ | $k_{cat-R}$ | $f_{e-x}$ fit | %SSE         |
|--------|-------------|---------------|--------------|
| 7.22   | 7.3         | 1.50E-15      | <b>3.9%</b>  |
| 7.22   | 13.9        | 1.55E-15      | <b>-9.2%</b> |
| 7.48   | 7.3         | 3.44E-15      | <b>44.5%</b> |
| 7.48   | 13.9        | 3.68E-15      | <b>0.0%</b>  |

Supplemental Table S4. qPCR primers

| Gene  | Forward Primer       | Reverse Primer           |
|-------|----------------------|--------------------------|
| csoS1 | ATGACCAAGGCAGCAGAAGT | ACCAAGTGCTGGCTCAACTT     |
| csoS2 | CTGCGGATCTACTCCAAAGC | GTCATCGCCTGTTACGATT      |
| csoS3 | AGGGCCTTATATGCATGGTG | GAGCCAATCTTCCGTCAGAG     |
| cbbL  | GCTGAAGCCGTTAAACTTGC | GCAAACCTGTCACGTTTCGTA    |
| cbbS  | CCCTTTCTTTGGGGAAAAAG | TAGCGTCCTTGGAAAACTGC     |
| bicA1 | GCGATGGTGCATTAGACAGA | GCTCCAAGAAGTCCAGAAC      |
| bicA2 | GTTGGACTTTATGGCGCATT | CCAATAGCAACAACCCAGT      |
| sbtA  | CCCAGAAGCACGATCAAGTT | CGGGGAAAGTGGGATAATTT     |
| rpoD  | AAGGGGTTTTGGCGACTTTA | CCATTTCTGTTTGGATGTCTTAGC |
| gyrA  | GTGCTTTTGGTCTTGGGAAA | TGTTGAGAGATTTTATCGGCATT  |

Supplemental Figure S1. Carbon fixation rates of crude Rubisco extract from *Prochlorococcus* MED4 measured at 20 °C (black circles, error bars are standard deviation of 2 technical replicates of extracts comprised of 3 pooled biological replicates). Half saturation constant for CO<sub>2</sub> was calculated from a Michaelis-Menten curve using a least-squares fit (line).

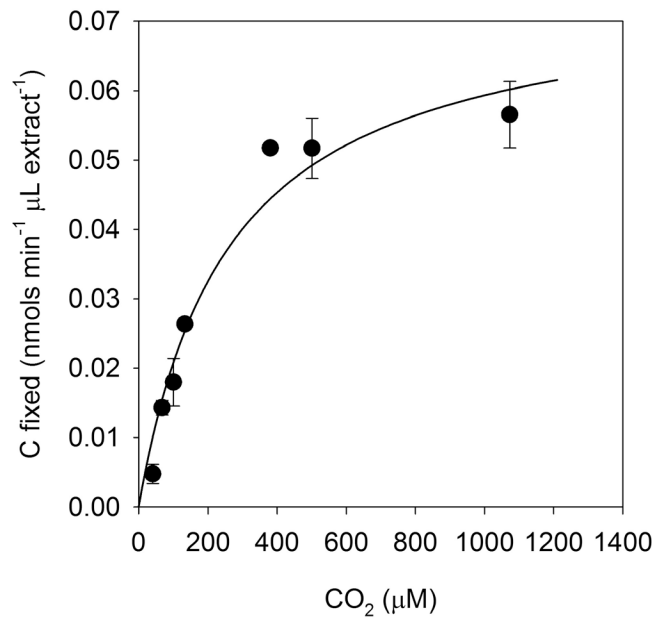

Supplemental Figure S2. Effect of varying RubisCO  $K_m$  on model fit to data.

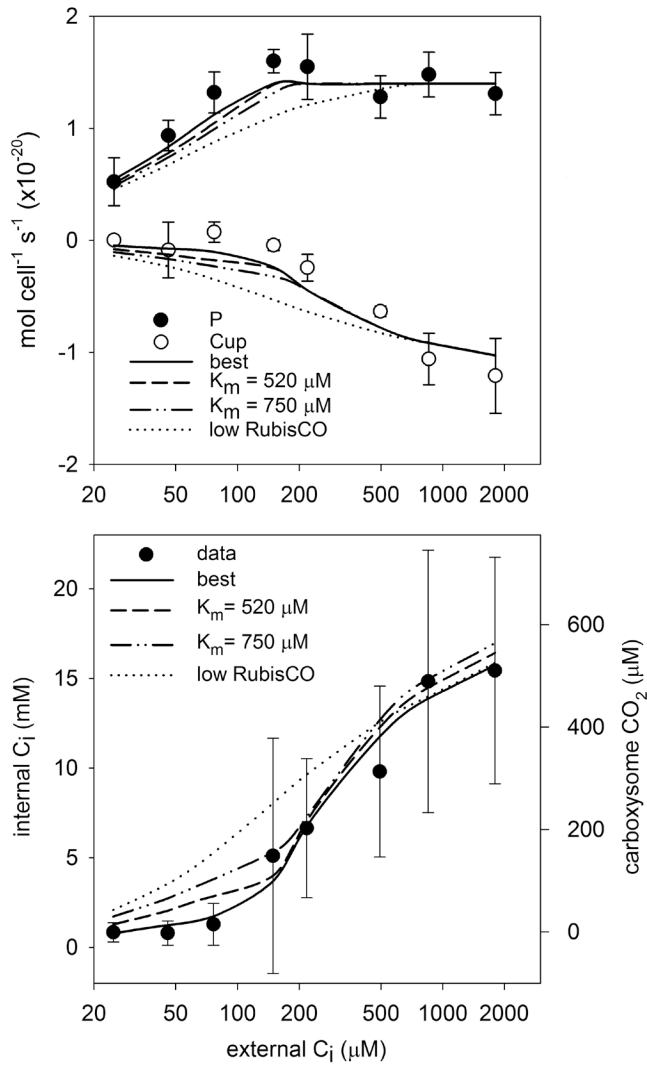

Supplemental Figure S3. Sample data showing continued CO<sub>2</sub> concentrations above equilibrium after turning off the light and how CO<sub>2</sub> efflux is calculated from this data. The raw data is first smoothed by LOESS smoothing using cross-validation to select the bandwidth of the smoothing. The smoothed CO<sub>2</sub> data is then used to calculate the CO<sub>2</sub> efflux rate based on equation 1.

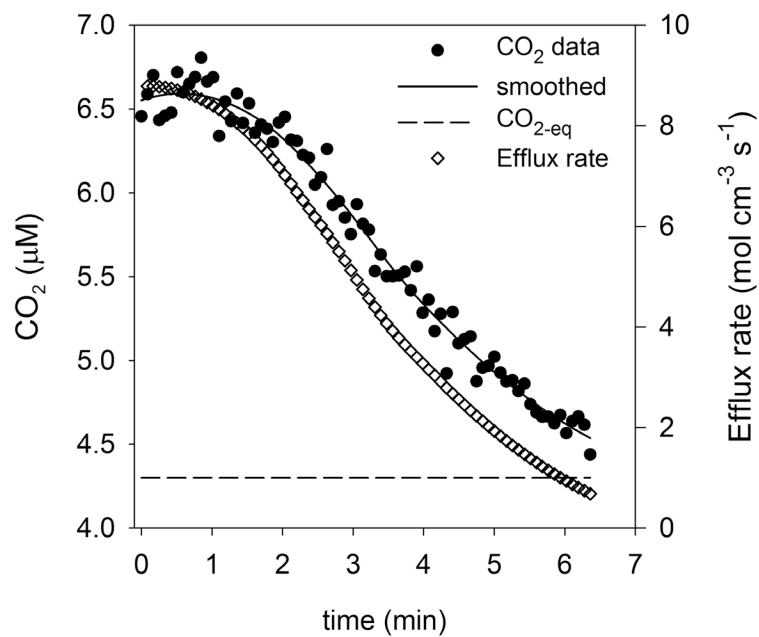

Supplement: supp_pp.114.247049_247049supp.pdf [file supp_pp.114.247049_247049supp.pdf]
